# Supplementary material for: ENO2 Promotes Colorectal Cancer Metastasis by Interacting with the LncRNA CYTOR and Activating YAP1-Induced EMT
Source: MDPI journal article supplement (doi:10.3390/cells11152363), 2022-08-01
Supplement: s1 [file s1]

**TableS2 Nucleotide sequence**

## Primers For qPCR

|             |                        |                         |
|-------------|------------------------|-------------------------|
| ENO2        | CGTTACTTAGGCAAAGGTGTCC | CTCCAGCATCAGGTTGTCCAGT  |
| ACTIN       | CATGTACGTTGCTATCCAGGC  | CTCCTTAATGTACGCACGAT    |
| CYTOR       | GACCCAGCAACCATCTCCTG   | GGGGGCTGAGTCGTGATTTT    |
| PKM2        | TGTCGAAGCCCCATAGTGAA   | GGGTGGTGAATCAATGTCCA    |
| YAP1        | TAGCCCTGCGTAGCCAGTTA   | CATGCTTAGTCCACTGTCTGT   |
| MIR4435-2HG | GACATTCCAGACAAGCGGTG   | GAAAAGATGCTGGTGACTGC    |
| LINC01133   | CTAATCTCACCACAGCCTGG   | GCCTGGATTACCAATGAGGA    |
| CDH1        | CGAGAGCTACACGTTACGG    | GGTGTGCGAGGGAAAAATAGG   |
| CDH2        | GCCAACCTTAAGTGGAGT     | GCAAGTTGATTGGAGGGATG    |
| SLUG        | ACCTTGTGTTTGCAAGATCTGC | TGCAAATGCTCTGTTGCAGTGAG |
| OCLN        | ACAAGCGGTTTTATCCAGAGTC | GTCATCCACAGGCGAAGTTAAT  |

## ShRNA oligos

|          |                       |                       |
|----------|-----------------------|-----------------------|
| shENO2-1 | CGTTCTGAACGTCTGGCTAAA | TTAGCCAGACGTTTCAGAACG |
| shENO2-2 | GCCGGACATAACTTCCGTAAT | ATTACGGAAGTTATGTCCGGC |
| shENO2-3 | CAAACAGCGTTACTTAGGCAA | TTGCCTAAGTAACGCTGTTTG |

## SiRNA sequences

|           |                         |                         |
|-----------|-------------------------|-------------------------|
| si-ENO2-1 | CGUUCUGAACGUCUGGCUAAATT | UUUAGCCAGACGUUCAGAACGTT |
| si-ENO2-2 | CAAGGGAGUCAUCAAGGACAATT | UUGUCCUUGAUGACUCCCUUGTT |
| si-CYTOR  | CAGUCUCUAUGUGUCUUAATT   | UUAAGACACAUAGAGACUGTT   |
| si-PKM2   | GUGGAUGAUGGGCUUAUUUUCTT | GAAAUAAGCCCAUCAUCCACGTT |
| si-YAP1-1 | GCCACCAAGCUAGAUAAAGAATT | UUCUUUAUCUAGCUUGGUGGCTT |
| si-YAP1-2 | CAGGUGAUACUAUCAACCAAATT | UUUGGUUGAUAGUAUACCUUGTT |

## Overexpress and single point mutants primers

|                |                                                   |                                                 |
|----------------|---------------------------------------------------|-------------------------------------------------|
| ENO2-FL-Flag   | gatgacgatgacaaggatataTGTTCCA<br>TAGAGAAGATCTGGGCC | atccttcgcgccgcgatccTCACAG<br>CACACTGGGATTACGG   |
| ENO2 1-304aa   | gatgacgatgacaaggatataTGTTCCA<br>TAGAGAAGATCTGGGCC | atccttcgcgccgcgatccTCACCA<br>GGCAGCCCAATCA      |
| ENO2 305-434aa | gatgacgatgacaaggatataTGTTCCA<br>AGTTCACAGCCAATGT  | atccttcgcgccgcgatccTCACAG<br>CACACTGGGATTACGG   |
| ENO2 1-369aa   | gatgacgatgacaaggatataTGTTCCA<br>TAGAGAAGATCTGGGCC | atccttcgcgccgcgatccTCACAC<br>CATGACCCCCCA       |
| ENO2 367-434aa | gatgacgatgacaaggatataTGTTGA<br>GTCATCGCTCAGGA     | atccttcgcgccgcgatccTCACAG<br>CACACTGGGATTACGG   |
| ENO2 1-380aa   | gatgacgatgacaaggatataTGTTCCA<br>TAGAGAAGATCTGGGCC | atccttcgcgccgcgatccTCAGAA<br>TGTGTCTCAGTCTCTCCT |
| ENO2-SBD-mut   | atggtgctgctgctgctGGAGAGACT<br>GAGGACACATTC        | agcagcagcagcCACCATGACCC<br>CCCAGCCATT           |
| ENO2-T-mut     | agaggctgaggacgcttctATTGCTGA<br>CCTGGTGGTGGG       | aagcgtcctcagcctctccTGAGCGAT<br>GACTCACCATGACC   |
| ENO2-F-mut     | agagactgaggacacagctATTGCTGA<br>CCTGGTGGTGGG       | ctgtgtcctcagctctccTGAGCGAT<br>GACTCACCATGACC    |
| ENO2-ED-mut    | agctactgctgctacattcATTGCTGAC                      | atgtagcagcagtagctccTGAGCGA                      |

|             |                              |                           |
|-------------|------------------------------|---------------------------|
|             | CTGGTGGTGGG                  | TGACTCACCATGACC           |
| ENO2-G-mut  | tgagactgaggacacattcATTGCTGA  | atgtgtcctcagtcacgTGAGCGAT |
|             | CCTGGTGGTGGG                 | GACTCACCATGACC            |
| ENO2-AL-mut | tgctgctgctgctgctgctATTGCTGAC | cagcagcagcagcagcagcTGAGCG |
|             | CTGGTGGTGGG                  | ATGACTCACCATGAC           |

---
