# Supplementary material for: ENO2 Promotes Colorectal Cancer Metastasis by Interacting with the LncRNA CYTOR and Activating YAP1-Induced EMT
Source: MDPI journal article supplement (doi:10.3390/cells11152363), 2022-08-01
Supplement: s1 [file s1]

**TableS3 Relationship between ENO2 expression and clinical pathological characteristic of CRC patients**

| Characteristics            | Number<br>(%) | ENO2 expression |           |          | $\chi^2$ | P value |
|----------------------------|---------------|-----------------|-----------|----------|----------|---------|
|                            |               | High(%)         | Middle(%) | Low(%)   |          |         |
| Age                        |               |                 |           |          |          |         |
| ≤60                        | 79(42.9)      | 27(14.7)        | 30(16.3)  | 22(11.9) | 3.75     | 0.153   |
| >60                        | 105(57.1)     | 26(14.1)        | 36(19.6)  | 43(23.4) |          |         |
| Gender                     |               |                 |           |          |          |         |
| Male                       | 103(56.5)     | 35(19)          | 37(20.1)  | 31(16.8) | 3.988    | 0.136   |
| Female                     | 81(43.5)      | 18(9.8)         | 29(15.8)  | 34(18.5) |          |         |
| Tumor site★                |               |                 |           |          |          |         |
| Colon                      | 101(54.9)     | 32(17.4)        | 40(21.7)  | 29(15.8) | 3.494    | 0.174   |
| Rectal                     | 81(44)        | 21(11.4)        | 26(14.1)  | 34(18.5) |          |         |
| Tumor size★                |               |                 |           |          |          |         |
| ≤5 cm                      | 112(60.9)     | 31(16.8)        | 39(21.2)  | 42(22.8) | 0.711    | 0.701   |
| >5 cm                      | 64(34.8)      | 19(10.3)        | 25(13.6)  | 20(10.9) |          |         |
| Histological type          |               |                 |           |          |          |         |
| tubular<br>adenocarcinoma  | 131(71.2)     | 37(20.1)        | 49(26.6)  | 45(24.5) | 0.471    | 0.79    |
| other type                 | 53(28.8)      | 16(8.7)         | 17(9.2)   | 20(10.9) |          |         |
| Degree of differentiation★ |               |                 |           |          |          |         |
| High/moderate              | 136(73.9)     | 35(19)          | 48(26)    | 53(28.8) | 4.411    | 0.11    |
| Poor/undifferentiated      | 47(25.5)      | 18(9.8)         | 18(9.8)   | 11(5.9)  |          |         |
| Gross type                 |               |                 |           |          |          |         |
| Ulcerative type            | 102(55.4)     | 34(18.5)        | 38(20.7)  | 30(16.3) | 4.019    | 0.134   |
| Other type                 | 82(44.6)      | 19(10.3)        | 28(15.2)  | 35(19)   |          |         |
| Lymph node invasion        |               |                 |           |          |          |         |
| N0                         | 102(55.4)     | 29(15.8)        | 36(19.6)  | 37(20.1) | 0.514    | 0.773   |
| N1                         | 77(41.8)      | 24(13)          | 29(15.8)  | 24(13)   |          |         |
| Unknown                    | 5(2.7)        |                 |           |          |          |         |
| Vascular invasion          |               |                 |           |          |          |         |
| N0                         | 121(65.8)     | 33(17.9)        | 47(25.5)  | 41(22.3) | 0.199    | 0.905   |
| N1                         | 51(27.7)      | 15(8.2)         | 18(9.8)   | 18(9.8)  |          |         |
| Unknown                    | 12(6.5)       |                 |           |          |          |         |
| TNM stage                  |               |                 |           |          |          |         |
| I/II                       | 173(94.0)     | 50(27.2)        | 64(34.8)  | 59(32.1) | 2.253    | 0.324   |
| III/IV                     | 11(6.0)       | 3(1.6)          | 2(1.1)    | 6(3.3)   |          |         |
| Survival                   |               |                 |           |          |          |         |
| ≤5 years                   | 56(30.4)      | 21(11.4)        | 19(10.3)  | 16(8.7)  | 8.312    | 0.016   |
| >5 years                   | 128(69.6)     | 32(17.4)        | 47(25.6)  | 49(26.6) |          |         |

★Patients with missing or inconclusive statistical information were excluded.

Statistical differences were calculated using the Chi-Square test
