# Supplementary material for: ENO2 Promotes Colorectal Cancer Metastasis by Interacting with the LncRNA CYTOR and Activating YAP1-Induced EMT
Source: MDPI journal article supplement (doi:10.3390/cells11152363), 2022-08-01
Supplement: s1 [file s1]

**TableS1 Key resources table**

| REAGENT or RESOURCE                                  | SOURCE           | IDENTIFIER                            |
|------------------------------------------------------|------------------|---------------------------------------|
| <b>Antibodies</b>                                    |                  |                                       |
| Mouse monoclonal anti-ENO2                           | Santa Cruz       | sc-376375                             |
| Rabbit monoclonal anti-ENO2                          | CST              | Cat#6516S                             |
| Mouse monoclonal anti-GAPDH                          | Multi-sciences   | Cat#A85370844                         |
| Monoclonal ANTI-FLAG® M2 antibody                    | Sigma            | F1804-50UG                            |
| Mouse monoclonal anti- Actin                         | Multi-sciences   | Cat#70-ab008                          |
| Rabbit monoclonal anti-YAP1                          | CST              | Cat#3724S                             |
| Rabbit monoclonal anti-p-YAP1                        | CST              | Cat#13008                             |
| Rabbit monoclonal anti-E-cadherin                    | CST              | Cat#3195S                             |
| Rabbit monoclonal anti-OCN                           | Abcam            | ab216327                              |
| Rabbit monoclonal anti-SNAI                          | CST              | Cat#3879S                             |
| Rabbit monoclonal anti-SLUG                          | Abcam            | ab27568                               |
| Mouse monoclonal anti-LATS1                          | Santa Cruz       | sc-398560                             |
| Rabbit monoclonal anti-LATS1                         | CST              | Cat#3477T                             |
| Rabbit monoclonal anti-LATS2                         | CST              | Cat#5888T                             |
| Rabbit IgG(H+L)                                      | CST              | Cat#3900                              |
| Mouse IgG(H+L)                                       | Santa Cruz       | sc-2025                               |
| Alexa® Fluor 488 Donkey anti-Mouse IgG (H+L)         | ThermoFisher     | Cat#A-21202                           |
| Alexa® Fluor 546 Goat anti-Rabbit IgG (H+L)          | ThermoFisher     | Cat#A-11010                           |
| IRDye® 800CW Goat-anti-Rabbit Antibody               | LI-COR           | Cat#926-32211                         |
| IRDye® 680CW Goat-anti-Mouse Antibody                | LI-COR           | Cat#926-68070                         |
| <b>Bacterial</b>                                     |                  |                                       |
| DH5a                                                 | Vazyme           | C502-02                               |
| <b>Biological Samples</b>                            |                  |                                       |
|                                                      | Run RunShaw      |                                       |
| Patient samples                                      | HospitalZhejiang |                                       |
|                                                      | University       |                                       |
| <b>Chemicals, Peptides, and Recombinant Proteins</b> |                  |                                       |
| D-luciferin                                          | Goldbio          | Cat#LUCNA (Luciferin, Potassium Salt) |
| G 418 disulfate salt                                 | Sigma            | G 5013                                |
| GenMute siRNA Transfection Reagent                   | SignaGen         | Cat # SL100568                        |
| Human Plasma Fibronectin Purified Protein            | Millipore        | FC010-1MG                             |
| Lipofectamine2000                                    | Invitrogen       | Cat#11668027                          |
| LipoD293                                             | SignaGen         | Cat # SL100668                        |
| Matrigel                                             | BD Biosciences   | Cat #356234                           |
| Puromycin                                            | Sigma            | Cat#P8833-10MG                        |
| Trizol                                               | Invitrogen       | Cat#15596018                          |
| <b>Critical Commercial Assays</b>                    |                  |                                       |
| Anti-FLAG® M2 Magnetic Beads                         | Sigma            | Cat#M8823                             |
| BCA protein assay                                    | ThermoFisher     | Cat#23225                             |
| ClonExpress-II One Step Cloning Kit                  | Vazyme           | C112                                  |

|                                        |            |            |
|----------------------------------------|------------|------------|
| Seahorse XF Glycolytic Rate Assay Kit  | Agilent    | 103344-100 |
| Mut Express II Fast Mutagenesis Kit V2 | Vazyme     | C214       |
| Protein A/G PLUS-Agarose               | Santa Cruz | sc-2003    |
| Oligonucleotides                       |            |            |
| Primers for QPCR, see below            | hzyKang    | Table S2   |
| siRNA ENO2-1                           | GenePharma |            |
| siRNA ENO2-2                           | GenePharma |            |
| siRNA CYTOR                            | GenePharma |            |
| siRNA si-PKM2                          | GenePharma |            |
| siRNA YAP1-1                           | GenePharma |            |
| siRNA YAP1-2                           | GenePharma |            |
| siRNA Negative Control                 | GenePharma |            |
