# Supplementary material for: ENO2 Promotes Colorectal Cancer Metastasis by Interacting with the LncRNA CYTOR and Activating YAP1-Induced EMT
Source: MDPI journal article supplement (doi:10.3390/cells11152363), 2022-08-01
Supplement: s1 [file s1]

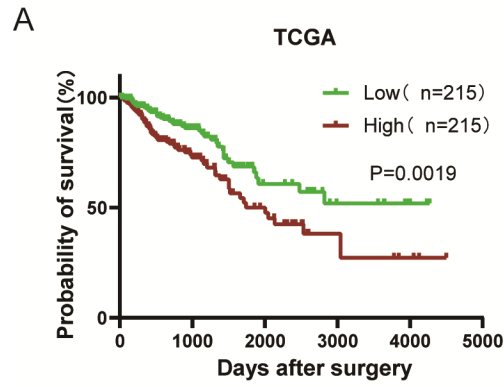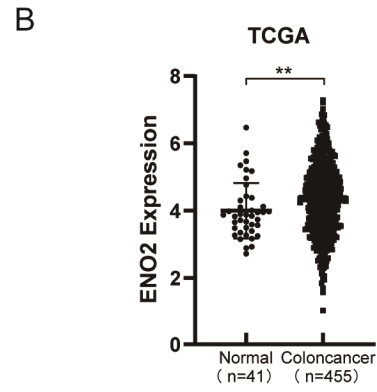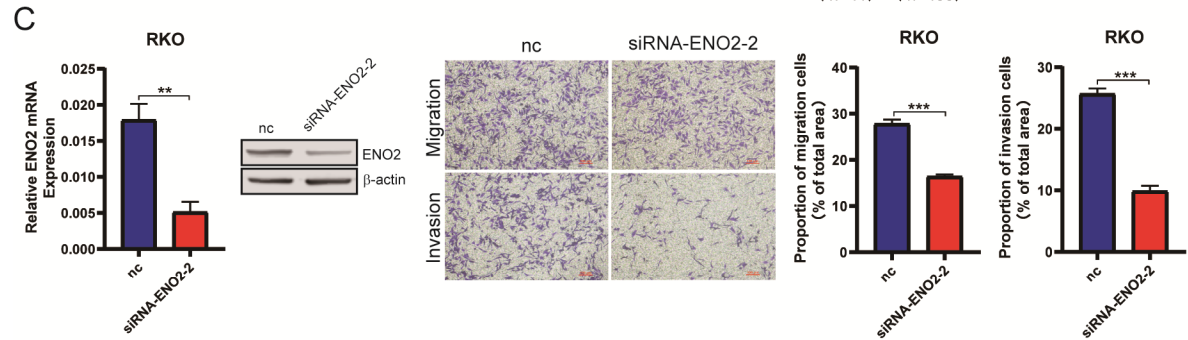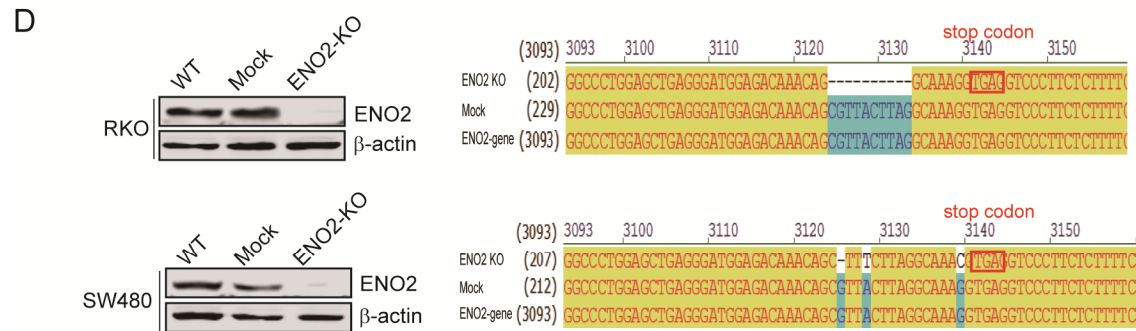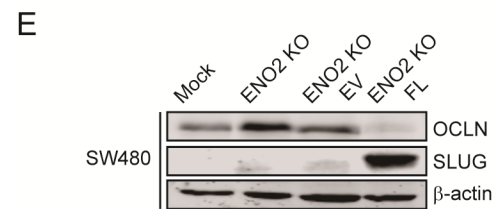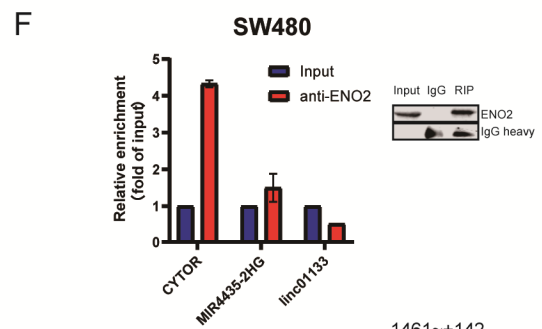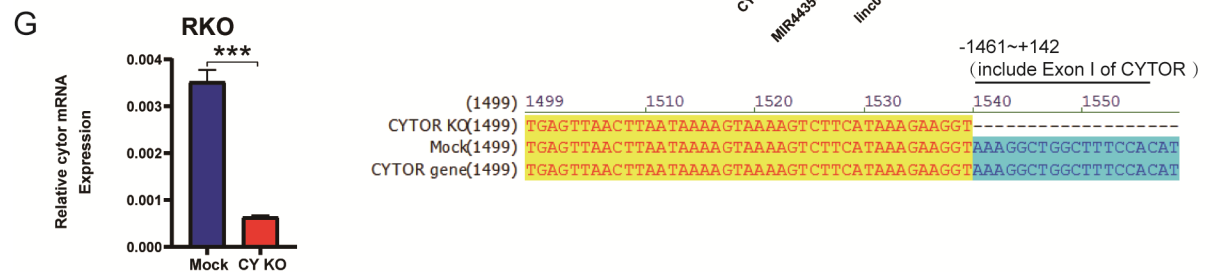

H

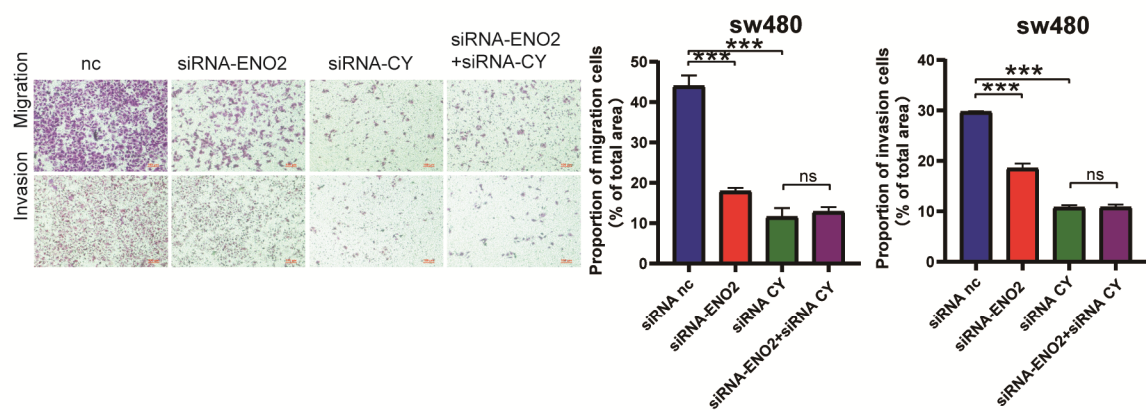

I

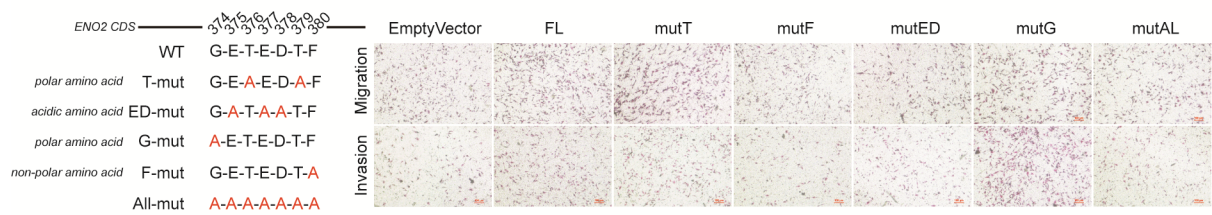

J

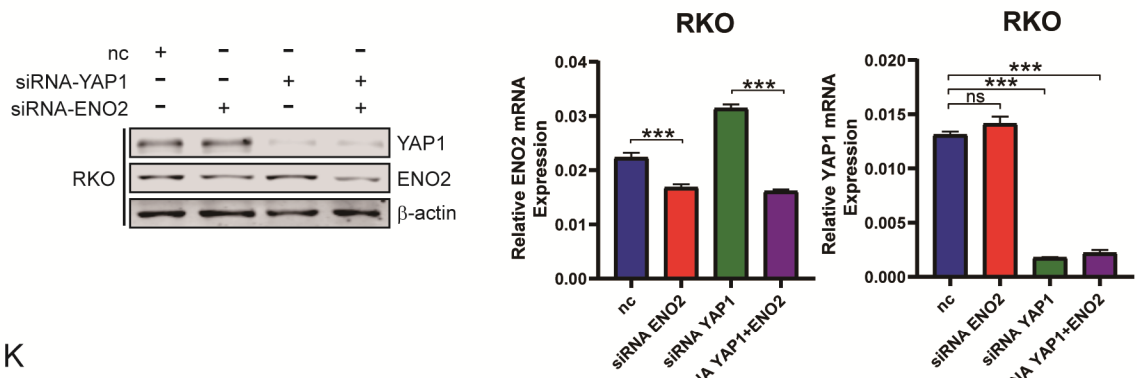

K

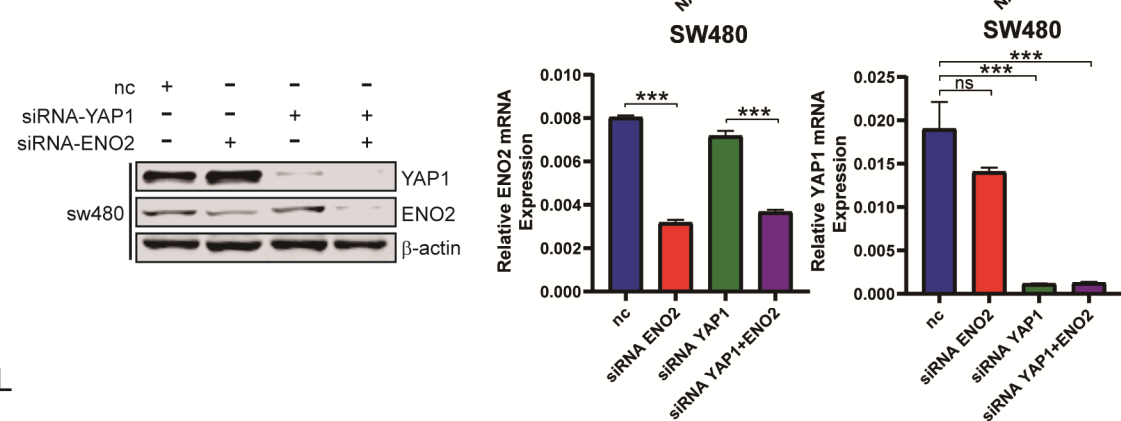

L

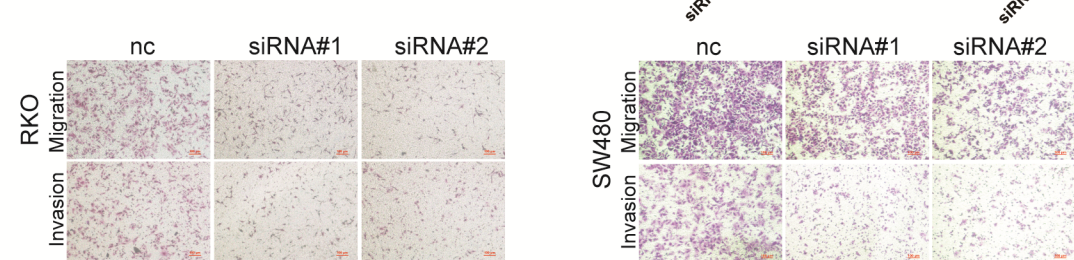

**Figure S1 ENO2 promotes colorectal cancer metastasis by interacting with CYTOR and activating YAP1-induced EMT**

A: Prognostic role of ENO2 expression in TCGA cohort.

B: ENO2 expression in CRC and normal colon tissues.

C: Identification of ENO2 knockdown by another siRNA-ENO2 on RKO migration and invasion. Shown from left to right are mRNA as measured by qPCR, protein levels as measured by western blot, representative transwell images and statistical results from the transwell migration and invasion assays.

D: Identification of RKO ENO2 KO and SW480 ENO2 KO. Left: The expression of ENO2 in wild type (WT), mock control (Mock) and ENO2KO cells were tested by WB. Right: Alignment of ENO2KO sequencing results. Red box indicates stop codon.

E: The expression of EMT-related genes after reintroducing ENO2 into ENO2-silenced SW480 cells.

F: RIP analysis of endogenous ENO2 binding to RNA in SW480 cells.

G: Identification of CYTOR KO in RKO. Left: The expression of CYTOR in mock control (Mock) and CYTOR-KO cells were tested by qPCR. Right: Alignment of CYTOR-KO sequencing results. The region of promoter and Exon I of CYTOR was deleted.

H: Migration and invasion of SW480 cells with CYTOR and ENO2 knockdown.

I: Schematic representation and functions of single point mutations to amino acid residues 374–380 of ENO2.

J-K: Characterization of simultaneous knockdown of ENO2 and YAP1 in RKO and SW480 cells. Protein and RNA expression are reflected by western blot and qPCR results.

L: The migration and invasion of RKO cells with YAP1 knockdown(left)and SW480 YAP1 knockdown(right). Data are shown as the mean  $\pm$  SD., \*\* $P$ <0.01, \*\*\* $P$ <0.001.
